# Supplementary material for: New insight into Alzheimer's disease: Light reverses Aβ-obstructed interstitial fluid flow and ameliorates memory decline in APP/PS1 mice
Source: PubMed Central journal article supplement — Alzheimers Dement (N Y). 2019 Oct 30;5:671–84. doi: 10.1016/j.trci.2019.09.007 (PMC6838540; doi:10.1016/j.trci.2019.09.007), 2019-10-30
Supplement: mmc1.pdf [file mmc1.pdf]

## Supplementary Figure 1

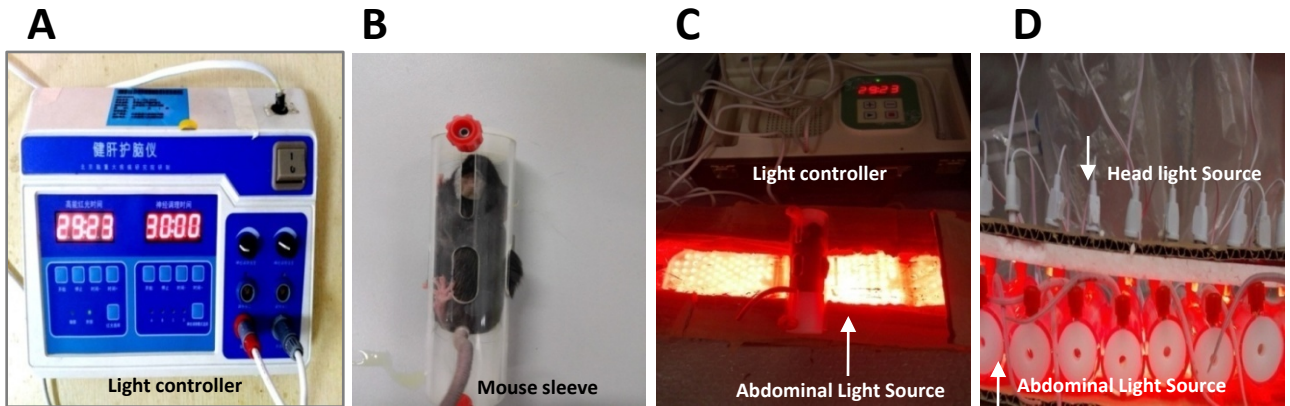

**Figure S1.** Light-emitting diode with red light (LED-RL, 630 nm) illuminates in the brains and livers of APP/S11 mice. **A**, The device of LED-RL. **B**, Mouse was fixed in the plastic sleeve. **C**, **D**, Mice were illuminated with a head light source (**C**) and an abdomen light source (**D**) for consecutive 2 months (n = 10).

## Supplementary Figure 2

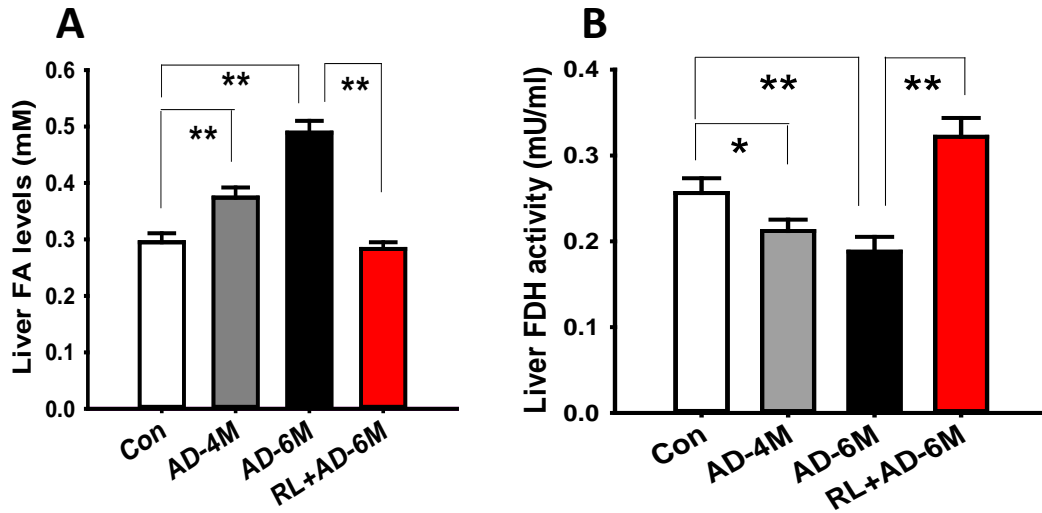

**Figure S2.** Red light illumination decreases FA levels and improves FDH activity in the livers of APP/SI1 mice. **A**, Quantitative assessment of liver FA levels detected by using high-performance liquid chromatography(HPLC).  $n= 8$ . **B**, Quantitative results of liver FDH activity analyzed by FDH kit.  $n =8$ ;  $** p < 0.01$ ; values are mean  $\pm$  s.e.m.

### Supplementary Figure 3

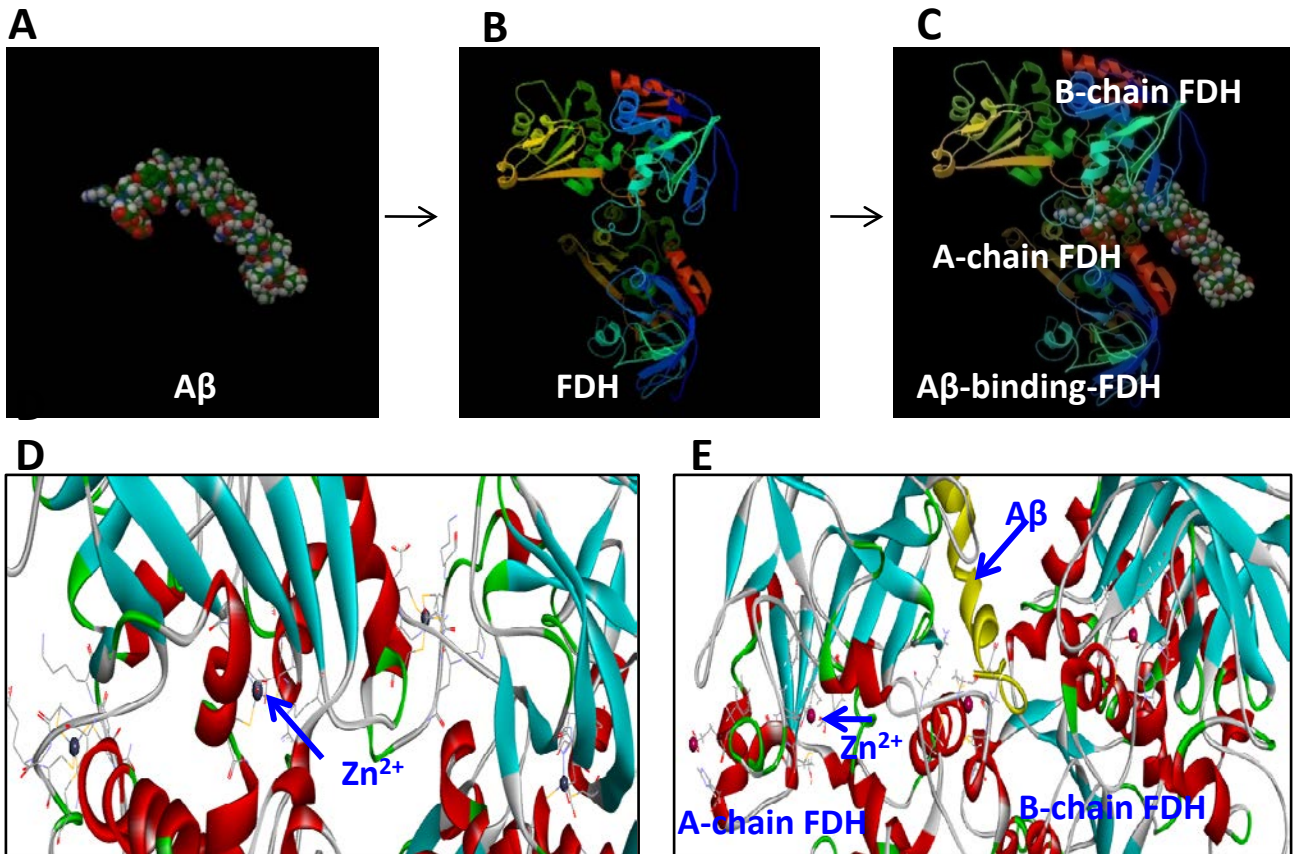

**Figure S3.** Molecular simulation: A $\beta$ -binding with FDH by using Autodock software. **A**, Human A $\beta$  (PDB ID: 1Z0Q). **B**, human FDH (PDB ID: 1TEH). **C**, A $\beta$ -binding with FDH. **D**, Zn<sup>2+</sup> in the A and B chains of FDH. **E**, A $\beta$ -binding with A and B chains of FDH by Hydrogen -bond connection. FDH: formaldehyde dehydrogenase

## Supplementary Figure 4

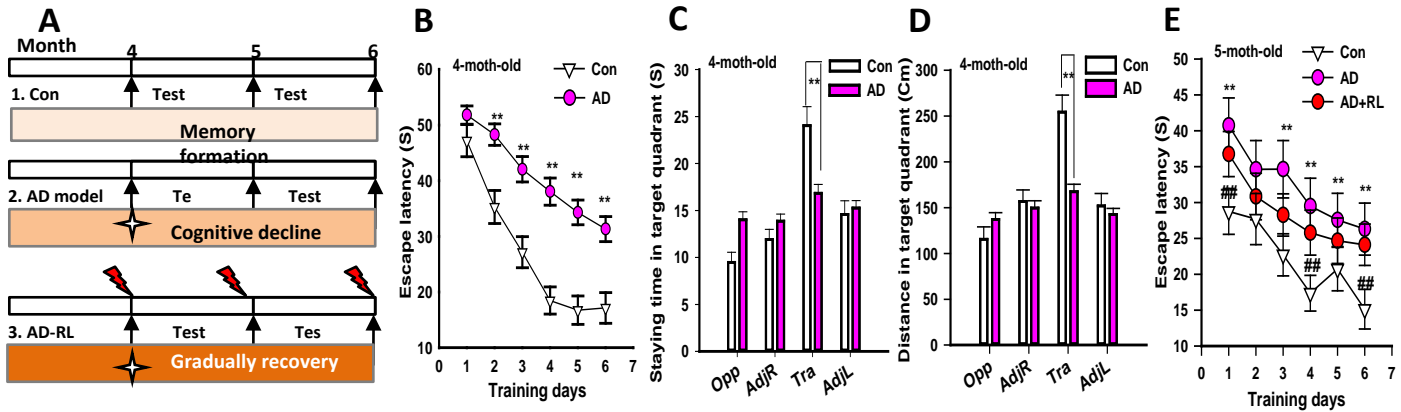

**Figure S4. The changes in spatial memory in APP/PS1 mice with or without 630-nm red light illumination.**

(A) The time schedule for R-LED irradiation on the three groups' APP/PSI mice. (B, C, D) APP/PSI mice without red light treatment exhibited a longer escape latency, a shorter time and shorter swimming distance in target quadrant than healthy control mice ( $n = 10$ ). (E) One-month R-LED irradiation on APP/PSI mice improved the ability of spatial learning in than APP/PSI mice without R-LED treatments ( $n = 10$ ).

## Supplementary Figure 5

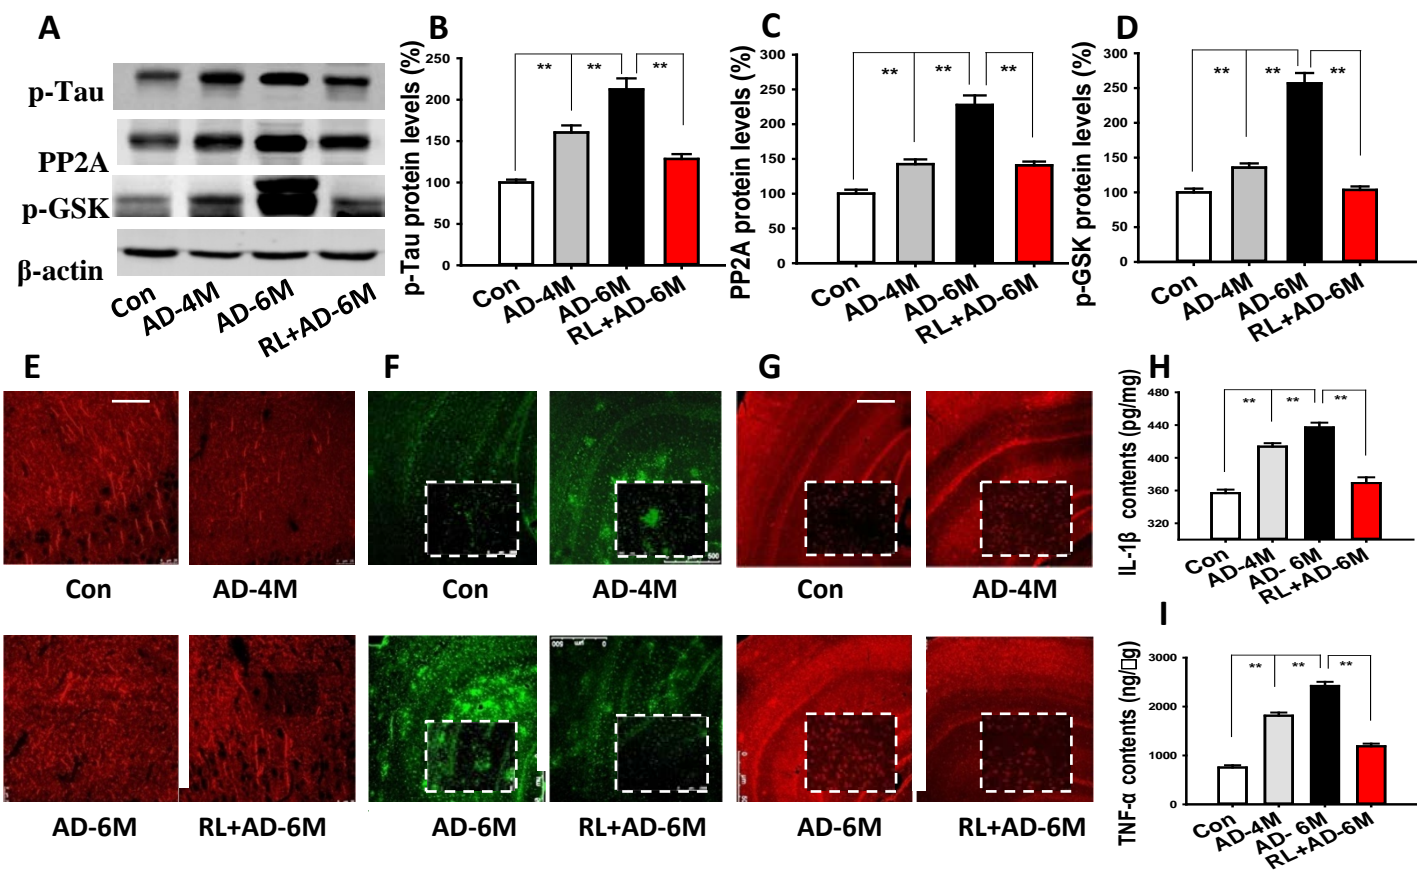

**Figure S5.** Red light inhibits tau hyperphosphorylation and other AD-associated phenotypes in APP/PS1 transgenic mice. **A-D**, Representative Western blotting images (**A**) and quantification of the Alzheimer' disease-related proteins expression, Tau p-Tyr181 (**B**) PP2A (**C**), and GSK $\alpha/\beta$  p-Tyr279/216 (**D**) in these four groups of mice. Con: wild C57BL/6 mice; AD-4M: 4-month old APP/PS1 mice; AD-6M: 6-month old APP/PS1 mice; RL+AD-6M: 6-month old APP/PS1 mice with 2-month RL illumination. (n =6-9 mice each). **E-G**, Representative immunohistochemical images depicting the synapse expression strained by MAP2 antibody (**E**), the over-proliferation of astrocytes strained by GFAP antibody (**F**) and microglia stained by CD45 antibody (**G**) in the hippocampus and cortex. Scale bar, 500  $\mu$ m. n=3-6 sections from 3-4 mice each. **H, I**, Quantitative assessment of brain IL- $\beta$  levels (**H**) and TNF $\alpha$  (**I**) detected by ELISA kits (n = 8). \*\*  $p < 0.01$ ; values are mean  $\pm$  SEM.

## Supplementary Figure 6

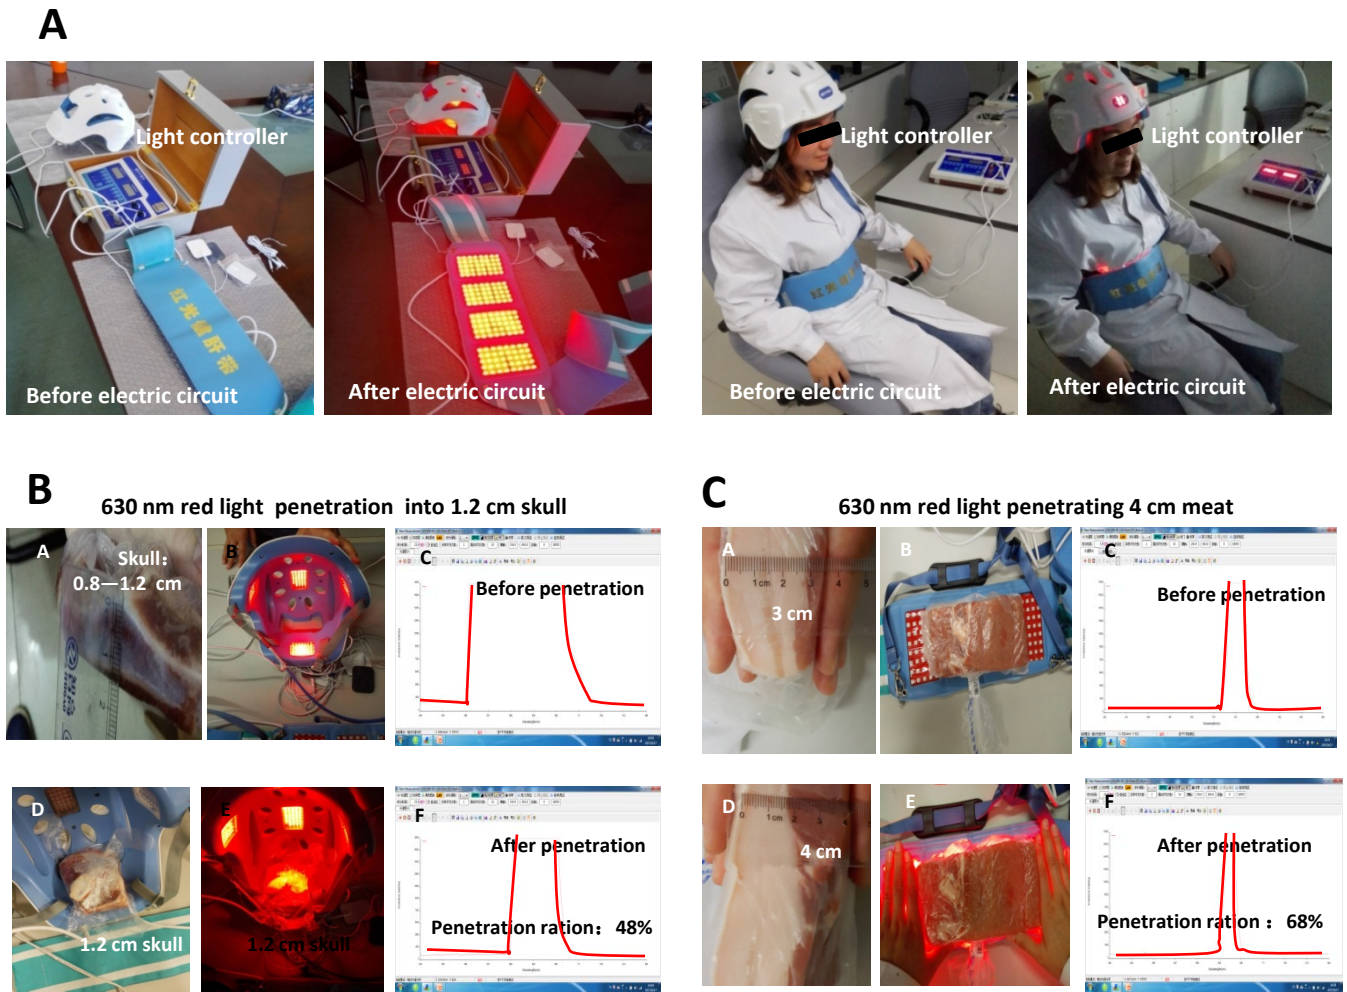

**Figure S6.** Red light at 630 nm penetrates into 1.2 cm skull and 1.5 cm abdomen which mimicked human samples. **A**, The LED-red light device before or after electric circuit. **B**, The mean thickness of human skull is about 1 cm. A skull with 1.2 cm thickness was selected to be illuminated, and 630 nm-red light can penetrate it with ~48% penetration ratio. **C**, The mean thickness of human abdomen is about 1.5 cm. A piece of meat with 3~4 cm thickness was illuminated, and 630 nm-red light can penetrate it with ~68% penetration ratio.
