# Supplementary material for: New insight into Alzheimer's disease: Light reverses Aβ-obstructed interstitial fluid flow and ameliorates memory decline in APP/PS1 mice
Source: PubMed Central journal article supplement — Alzheimers Dement (N Y). 2019 Oct 30;5:671–84. doi: 10.1016/j.trci.2019.09.007 (PMC6838540; doi:10.1016/j.trci.2019.09.007), 2019-10-30
Supplement: mmc3.pdf [file mmc3.pdf]

**Table S1. A $\beta$  -binding A and B chains of FDH by H-bond. Donor = H donor; Receptor = H receptor.**

| Protein (P)          | Ligand (L)                                                 | Donor              | Receptor             | Bond Length |
|----------------------|------------------------------------------------------------|--------------------|----------------------|-------------|
| <b>1TEH_AB</b>       | <b>1Z0Q</b>                                                | P_A: ASN225:HND21  | L: GLU11:OE2         | 2.375       |
|                      |                                                            | P_A: LYS226: HNZ1  | L: VAL12: O          | 1.770       |
|                      |                                                            | P_A: HIS363:HD1    | L: GLU3:OE2          | 2.437       |
|                      |                                                            | P_B: LYS330:HZ1    | L: ARG5: O           | 1.996       |
|                      |                                                            | P_B: LYS330:HZ2    | L: ARG5: O           | 1.659       |
|                      |                                                            | L: ARG5: HE        | P_B: GLU326:OE2      | 2.292       |
|                      |                                                            | L: HIS6:HD1        | P_B: GLU326:OE1      | 2.292       |
|                      |                                                            | L: HIS13:HE2       | P_B: ASP161:OD1      | 1.540       |
|                      |                                                            | L: HIS14:HD1       | P_B: LYS82: O        | 2.466       |
|                      |                                                            | L:GLN15:HE21       | P_A: ASP227:OD2      | 1.671       |
| <b>1TEH_AB-Zn</b>    | (Under vacuum conditions)                                  | P_A: ASN225:ND2    | L: GLU11:OE2         | 2.973       |
|                      |                                                            | P_A: LYS226:NZ     | L: VAL12: O          | 2.572       |
|                      |                                                            | P_B: GLU326: N     | L: TYR10: OH         | 3.054       |
|                      |                                                            | P_B: LYS330:NZ     | L: ARG5: O           | 2.216       |
|                      |                                                            | P_B: LYS330:NZ     | L: SER8: OG          | 3.198       |
|                      |                                                            | L: ARG5: HE        | P_B: GLU326:OE2      | 2.289       |
|                      |                                                            | L: HIS6:HD1        | P_B: GLU326:OE1      | 2.292       |
|                      |                                                            | L: HIS13:HE2       | P_B: ASP161:OD1      | 1.537       |
|                      |                                                            | L: HIS14:HD1       | P_B: LYS82: O        | 2.462       |
|                      |                                                            | L:GLN15:HE21       | P_A: ASP227:OD2      | 1.670       |
| <b>1TEH_AB-eq</b>    |                                                            | P_A: HIS47:HE2     | L: GLU3: O           | 2.406       |
|                      |                                                            | P_A: SER54: HG     | L: ASP7:OD1          | 2.127       |
|                      |                                                            | P_B: LYS82:HZ2     | L: HIS13:NE22        | 2.335       |
|                      |                                                            | L: SER8: HG        | P_A: HIS363: O       | 1.757       |
|                      |                                                            | L: HIS14:HD1       | P_A:GLY18:O          | 2.357       |
| <b>1TEH_AB-Zn-eq</b> | <b>1Z0Q-eq</b><br>(Under the condition of ion equilibrium) | P_A: LYS226:HZ1    | L: VAL12: O          | 1.776       |
|                      |                                                            | P_A: LYS366:HZ1    | L: GLU11:OE1         | 2.169       |
|                      |                                                            | P_A: LYS366:HZ1    | L: GLU11:OE2         | 1.851       |
|                      |                                                            | P_A: LYS366:HZ2    | L: GLU11:OE1         | 1.556       |
|                      |                                                            | P_A: LYS366:HZ2    | L: GLU11:OE2         | 1.333       |
|                      |                                                            | P_A: LYS366:HZ3    | L: GLU11:OE2         | 1.579       |
|                      |                                                            | P_B: LYS82:HZ1     | L: ALA2: O           | 1.995       |
|                      |                                                            | P_B: LYS82:HZ2     | L: ASP1:OD2          | 2.487       |
|                      |                                                            | P_B: GLY98:HN      | L:ASP1: O            | 2.061       |
|                      |                                                            | P_B: LYS159:HZ3    | L: HIS14:NE2         | 1.752       |
|                      |                                                            | P_B: GLU326:HN     | <b>L: HIS63:NE2</b>  | 1.619       |
|                      |                                                            | <b>L: ASP1:HT1</b> | <b>P_B: GLN96: O</b> | 0.819       |
|                      |                                                            | <b>L: ASP1:HT2</b> | <b>P_B: GLN96: O</b> | 1.294       |
|                      |                                                            | <b>L: ASP1:HT3</b> | <b>P_B: GLN96: O</b> | 1.730       |
| L:GLN15:HE21         | P_A: ASP227:OD2                                            | 2.393              |                      |             |

**Table S2: Changes in the cysteine residues of CYS45, CYS90, CYS100, and CYS111 residues of the samples of hFDH, A $\beta$ +FDH, and RL+A $\beta$ +FDH.**

| <b>Cysteine status</b> | <b>Sample 1: FDH</b> | <b>Sample 2: A<math>\beta</math>+FDH</b> | <b>Sample 3: RL+A<math>\beta</math>+FDH</b> |
|------------------------|----------------------|------------------------------------------|---------------------------------------------|
| <b>Cys 43</b>          | %                    | %                                        | %                                           |
| <b>SH</b>              | 96.8                 | 95.3                                     | 94.6                                        |
| <b>MTHIO</b>           | 3.2                  | 4.2                                      | 4.3                                         |
| <b>SOxH</b>            |                      | 0.4                                      | 1.1                                         |
|                        |                      |                                          |                                             |
|                        |                      |                                          |                                             |
| <b>Cys 97,100</b>      |                      |                                          |                                             |
| <b>SH</b>              | 100.0                | 100.0                                    | 100.0                                       |
| <b>MTHIO</b>           |                      |                                          |                                             |
| <b>SOxH</b>            |                      |                                          | 0.3                                         |
| <b>S-S</b>             |                      | 1.4                                      |                                             |
|                        |                      |                                          |                                             |
| <b>Cys 111</b>         | %                    | %                                        | %                                           |
| <b>SH</b>              | 76.7                 | 93.2                                     | 92.1                                        |
| <b>MTHIO</b>           | 53.2                 | 6.8                                      | 5.3                                         |
| <b>S-S</b>             | 5.9                  |                                          | 2.6                                         |

**Table S3: Changes in the cysteine residues of CYS45, CYS90, CYS100, and CYS111 residues of sample 1-hFDH.**

| Modifications                                              | Area          |            | Area         | %        |
|------------------------------------------------------------|---------------|------------|--------------|----------|
| C4(Carbamidomethyl)                                        | 1525305SH     | Cys 43     |              |          |
| C4(Carbamidomethyl)                                        | 4162714SH     | SH         | 4717766<br>0 | 96.80317 |
| C4(Methylthio)                                             | 1557996MTHIO  | MTHIO      | 1557996      | 3.196829 |
| C4(Carbamidomethyl)                                        | 41489641SH    |            |              |          |
|                                                            |               | Cys 97,100 |              |          |
| C5(Carbamidomethyl); M6(Oxidation);<br>C8(Carbamidomethyl) | 3868177SH     | SH         | 4373136      | 100      |
| C6(Methylthio)                                             | 218750.3MTHIO | Cys 111    | Area         | %        |
| C1(Dehydro); C9(Dehydro)                                   | 286208.3S-S   | SH         | 1224353<br>9 | 76.67404 |
| C1(Dehydro)                                                | 244006S-S     | MTHIO      | 8490884      | 53.17338 |
| C1(Methylthio); C9(Methylthio)                             | 2293431MTHIO  | S-S        | 949382.4     | 5.94542  |
| C1(Methylthio); C9(Methylthio)                             | 364871.5MTHIO |            |              |          |
| C1(Methylthio); C9(Carbamidomethyl)                        | 4346956SH     | MTHIO      |              |          |
| C1(Carbamidomethyl); C9(Methylthio)                        | 803793.8SH    | MTHIO      |              |          |
| C1(Carbamidomethyl); C9(Methylthio)                        | 145588.7SH    | MTHIO      |              |          |
|                                                            | 1422834SH     |            |              |          |
| C6(Methylthio)                                             | 317492.7MTHIO |            |              |          |
| C6(Carbamidomethyl)                                        | 5524366SH     |            |              |          |

**Table S4: Changes in the cysteine residues of CYS45, CYS90, CYS100, and CYS111 residues of sample 2- A $\beta$ +FDH.**

| Modifications                                           | Area     |       |         |            |          |          |
|---------------------------------------------------------|----------|-------|---------|------------|----------|----------|
| C4(Methylthio)                                          | 3593866  | MTHIO | Cys 43  | Area       | %        |          |
| C4(Carbamidomethyl)                                     | 92585621 | SH    | SH      | 2.28E+08   | 95.31692 |          |
| C4(Methylthio)                                          | 4375416  | MTHIO | MTHIO   | 1016290    | 4.24385  |          |
| C4(Methylthio)                                          | 2193622  | MTHIO | SOxH    | 1051846    | 0.439232 |          |
| C4(Trioxidation)                                        | 1051846  | SOxH  | S-S     | ND         |          |          |
| C4(Carbamidomethyl)                                     | 1.02E+08 | SH    |         |            |          |          |
| C4(Carbamidomethyl)                                     | 33906144 | SH    |         |            |          |          |
|                                                         |          |       |         |            |          |          |
| C5(Carbamidomethyl); C8(Dehydro)                        | 157720.2 | SH    | S-S     | Cys 97,100 |          |          |
| C5(Carbamidomethyl); C8(Carbamidomethyl)                | 586814.6 | SH    | SH      | SH         | 1107675  | 100      |
|                                                         |          |       |         |            | 4        |          |
| C5(Carbamidomethyl); M6(Oxidation); C8(Carbamidomethyl) | 9845248  | SH    | SH      | S-S        | 157720.2 | 1.423884 |
| C4(Carbamidomethyl); M5(Oxidation); C7(Carbamidomethyl) | 486971.5 | SH    | SH      |            |          |          |
|                                                         |          |       |         |            |          |          |
| C6(Methylthio)                                          | 507735.2 | MTHIO | Cys 111 | Area       | %        |          |
| C6(Carbamidomethyl)                                     | 3917935  | SH    | SH      | 1699928    | 93.20222 |          |
|                                                         | 1097808  | SH    | MTHIO   | 1239857    | 6.797781 |          |
| C6(Methylthio)                                          | 732121.5 | MTHIO | SOxH    | ND         |          |          |
| C6(Carbamidomethyl)                                     | 11983539 | SH    | S-S     | ND         |          |          |

**Table S5: Changes in the cysteine residues of CYS45, CYS90, CYS100, and CYS111 residues of sample 3-RL+A $\beta$ +FDH.**

| Modifications                                              | Area          |         |                |              |        |
|------------------------------------------------------------|---------------|---------|----------------|--------------|--------|
| C4(Dioxidation)                                            | 6033516SOxH   | Cys 43  | Area           | %            |        |
| C4(Methylthio)                                             | 21570859MTHIO | SH      | 7.33E+08       | 94.61604     |        |
| C4(Methylthio)                                             | 8948802MTHIO  | MTHIO   | 33327636       | 4.30004      |        |
| C4(Trioxidation)                                           | 2367469SOxH   | SOxH    | 8400985        | 1.083922     |        |
| C4(Carbamidomethyl)                                        | 4.63E+08SH    | S-S     | ND             |              |        |
| C4(Carbamidomethyl)                                        | 1.67E+08SH    |         |                |              |        |
| C4(Methylthio)                                             | 2807975MTHIO  |         |                |              |        |
| C4(Carbamidomethyl)                                        | 1.03E+08SH    |         |                |              |        |
| C5(Dioxidation); M6(Oxidation);<br>C8(Carbamidomethyl)     | 69652.33SH    | SOxH    | Cys 97,100     |              |        |
| C5(Carbamidomethyl); C8(Carbamidomethyl)                   | 9525196SH     | SH      | SH             | 2061331<br>8 | 100    |
| C5(Carbamidomethyl); M6(Oxidation);<br>C8(Carbamidomethyl) | 9729114SH     | SH      | SOxH           | 69652.33     | 0.3379 |
| C4(Carbamidomethyl); C7(Carbamidomethyl)                   | 797207.1SH    | SH      |                |              |        |
| C4(Carbamidomethyl); M5(Oxidation);<br>C7(Carbamidomethyl) | 492148.6SH    | SH      |                |              |        |
| C6(Methylthio)                                             | 323035.8MTHIO | Cys 111 | Area           | %            |        |
| C6(Carbamidomethyl)                                        | 3874670SH     | SH      | 1504216<br>5   | 92.05637     |        |
| C1(Dehydro); C9(Dehydro)                                   | 432942.9S-S   | MTHIO   | 8650605.294071 |              |        |
| C6(Methylthio)                                             | 542024.2MTHIO | SOxH    | ND             |              |        |
| C6(Carbamidomethyl)                                        | 11167495SH    | S-S     | 432942.9       | 2.649562     |        |
